# Supplementary material for: Towards a sustainable synthesis of amides: chemoselective palladium-catalysed aminocarbonylation of aryl iodides in deep eutectic solvents
Source: Royal Society of Chemistry journal article supplement (doi:10.1039/c8cc03858a), 2018-01-01

## Supporting Information

### **Towards a Sustainable Synthesis of Amides: Chemoselective Palladium-catalysed Aminocarbonylation of Aryl Iodides in Deep Eutectic Solvents**

Francesco Messa,<sup>a</sup> Serena Perrone,<sup>a</sup> Martina Capua,<sup>a</sup> Francesco Tolomeo,<sup>a</sup> Luigino Troisi,<sup>a</sup> Vito Capriati<sup>\*,b</sup> and Antonio Salomone<sup>a,\*,a</sup>

<sup>a</sup> *Dipartimento di Scienze e Tecnologie Biologiche ed Ambientali, Università del Salento, Prov.le Lecce-Monteroni, I-73100, Lecce, Italy*

<sup>b</sup> *Dipartimento di Farmacia-Scienze del Farmaco, Università degli Studi di Bari "Aldo Moro", Consorzio C.I.N.M.P.I.S., Via E. Orabona 4, I-70125, Bari, Italy*

### **Table of Contents**

|                                                                                                                                                        |    |
|--------------------------------------------------------------------------------------------------------------------------------------------------------|----|
| <b>1. General Information</b>                                                                                                                          | S2 |
| <b>2. Experimental Protocols</b>                                                                                                                       |    |
| 2.1 Preparation of amides ( <b>5</b> ) in Deep Eutectic Solvents. Typical procedure                                                                    | S4 |
| 2.2 General procedure for the catalyst/DES recycling                                                                                                   | S4 |
| <b>3. Spectroscopic Characterisation of New Compounds</b>                                                                                              |    |
| 3.1 Characterisation data of compounds <b>5aa</b> , <b>5ac</b> , <b>5ba</b> , <b>5ga</b> , <b>5gb</b> , <b>5ha</b>                                     | S5 |
| 3.2 Copies of <sup>1</sup> H- and <sup>13</sup> C-NMR spectra of compounds <b>5aa</b> , <b>5ac</b> , <b>5ba</b> , <b>5ga</b> , <b>5gb</b> , <b>5ha</b> | S7 |

## 1. General Information

Deep Eutectic Solvents [choline chloride (ChCl)–glycerol (Gly) (1:2 mol/mol), ChCl–urea (1:2 mol/mol), lactic Acid–D-glucose (1:2 mol/mol)], were prepared by heating under stirring at 75 °C for 10–30 min the corresponding individual components until a clear solution was obtained. All other reagents, catalysts and solvents were high-grade commercial products, used without further purification. <sup>1</sup>H-NMR spectra were obtained using a Bruker spectrometer (<sup>1</sup>H: 400.13 MHz; <sup>13</sup>C: 100.62 MHz), CDCl<sub>3</sub> was used as the solvent.

Dimethyl sulfone has been used as the internal standard for yield determination by <sup>1</sup>H NMR analysis on the crude reaction mixtures. IR spectra were recorded with a Jasco FT-IR spectrophotometer. Gas chromatography (GC) was conducted on an Rtx-5 30 m fused silica capillary column (split ratio 100:1). The following program was used: method A = initial temperature of 100 °C for 0.0 min, ramp 10 °C/min to 280 °C, and held for 15 min; the standard operating conditions were 300 °C injector temperature and 290 °C detector temperature. GC-MS analyses, conducted using method A, were performed with a gas chromatograph equipped with a 5% phenylpolymethylsiloxane capillary column, 30 m, 0.25 mm i.d., and a mass-selective detector operating at 70 eV. High-resolution mass spectrometry (HRMS) analyses were performed using a Bruker microTOF QII mass spectrometer equipped with an electrospray ion source (ESI). Analytical thin layer chromatography (TLC) was carried out on pre-coated 0.25 mm thick plates of Kieselgel 60 F254; visualisation was accomplished by UV light (254 nm). Chromatographic separations were performed on silica gel (63–200 mesh) using petroleum ether/ethyl acetate (AcOEt) mixture as the eluent.

Compounds **3aa**<sup>1</sup>, **3ba**<sup>2</sup>, **3cb**<sup>3</sup>, **3db**<sup>4</sup>, **3ea**<sup>5</sup>, **5ab**<sup>6</sup>, **5ca**<sup>7</sup>, **5ea**<sup>8</sup>, **5eb**<sup>9</sup>, **5ec**<sup>10</sup>, **5ed**<sup>11</sup>, **5fa**<sup>12</sup>, **5ia**<sup>13</sup>, **5id**<sup>14</sup> are known, and their characterisation data are in agreement with those reported in the literature (see Refs. 1–14).

## References

- 1) A. S.-Y. Lee, C.-C. Wu, L.-S. Lin and H.-F. Hsu, *Synthesis*, 2004, 568–572.
- 2) N. Yoshikawa, L. Tan, J. C. McWilliams, D. Ramasam and R. Sheppard, *Org. Lett.*, 2010, **12**, 276–279.
- 3) L. Li, H. Sheng, F. Xu and Q. Shen, *Chin. J. Chem.*, 2009, **27**, 1127–1131.
- 4) P. Baburajan, R. Senthilkumaran and K. P. Elango, *New J. Chem.*, 2013, **37**, 3050–3056.
- 5) D. Bora, B. Ded, A. L. Fuller, A. M. Z. Slawin, D. Woollins and D. K. Dutta, *Inorg. Chim. Acta*, 2010, **363**, 1539–1546.
- 6) Z. Yin, Z. Wang, W. Li and X. F. Wu, *Eur. J. Org. Chem*, 2017, **13**, 1769–1772.
- 7) N. Schröder, J. Wencel-Delord and F. Glorius, *J. Am. Chem. Soc.*, 2012, **134**, 8298–8301.
- 8) J. R. Harjani, R. D. Singer, M. T. Garcia and P. J. Scammells, *Green Chem.*, 2009, **11**, 83–90.
- 9) G. Deguest, A. Devineau, L. Bischoff, C. Fruit and F. Marsais, *Org. Lett.*, 2006, **8**, 5889–5892.
- 10) R. Fu, Y. Yang, W. Jin, H. Gu, X. Zeng, W. Chai, Y. Ma, Q. Wang, J. Yi and R. Yuan, *RSC Adv.*, 2016, **6**, 107699–107707.

- 11) J. R. Martinelli, T. P. Clark, D. A. Watson, R. H. Munday and S. L. Buchwald, *Angew. Chem. Int. Ed.*, 2007, **46**, 8460–8463.
- 12) W. J. Ang, L. C. Lo and Y. Lam, *Tetrahedron*, 2014, **70**, 8545–8558.
- 13) K. R. Reddy, C. U. Maheswari, M. Venkateshwar and M. L. Kantam, *Eur. J. Org. Chem.*, 2008, **21**, 3619–3622.
- 14) L. Zhang, S. Su, H. Wu and S. Wang, *Tetrahedron*, 2009, **65**, 10022–10024.

## 2. Experimental Protocols

### 2.1 Preparation of amides (**5**) in Deep Eutectic Solvents. Typical procedure.

Aromatic iodide **1** (1.0 mmol), amine **4** (6.0 mmol), Pd(OAc)<sub>2</sub> (11.2 mg, 0.05 mmol, 5 mol%), K<sub>2</sub>CO<sub>3</sub> (414 mg, 3.0 mmol) and DES (2.0 g) were placed in a 25 mL autoclave reactor. The autoclave was purged three times with CO, pressurized to 27 atm CO, and then placed in an oil bath pre-heated at 60 °C. The reaction mixture was vigorously stirred at 60 °C for 12 h. After this time, the autoclave was depressurized, allowed to cool to room temperature, and the reaction mixture extracted with EtOAc (3 x 5 mL). The combined organic phases were dried over anhydrous Na<sub>2</sub>SO<sub>4</sub>, and the solvent was concentrated *in vacuo*. The crude product was purified by column chromatography on silica gel [petroleum ether/AcOEt (90:10–30:70)] to give the corresponding amide **5**.

### 2.2 General procedure for the catalyst/DES recycling.

The recyclability of Pd/DES system was investigated with reference to the carbonylative coupling between 1-chloro-3-iodobenzene **1a** and *n*-BuNH<sub>2</sub> **4a** as a model reaction. 1-Chloro-3-iodobenzene **1a** (476 mg, 2.0 mmol), *n*-BuNH<sub>2</sub> **4a** (878 mg, 12.0 mmol), Pd(OAc)<sub>2</sub> (22.4 mg, 0.1 mmol, 5 mol%) [or Pd/C (21.2 mg, 0.02 mmol, 1 mol%)], K<sub>2</sub>CO<sub>3</sub> (828 mg, 6.0 mmol) and 4.0 g of the eutectic mixture ChCl/urea (1:2 mol/mol), [or ChCl/Gly (1:2) when Pd/C was used as the catalyst] were placed in a 25 mL autoclave reactor. The autoclave was purged three times with CO, pressurized to 27 atm CO, and then placed in an oil bath pre-heated at 60 °C. The reaction mixture was vigorously stirred at 60 °C for 12 h. After this time, the autoclave was depressurized, allowed to cool to room temperature, and the eutectic mixture extracted with AcOEt (3 x 5 mL). The combined organic phases were separated, and the crude product **5aa** recovered. The DES phase was dried under vacuum until constant weight. Then, upon simply adding to the eutectic phase new, fresh reagents [**1a** (2.0 mmol), **4a** (12.0 mmol) and K<sub>2</sub>CO<sub>3</sub> (2.0 mmol)], carbonylative coupling could be successfully run over four times (for details, see main text, Figure 1).

### 3. Spectroscopic Characterisation of New Compounds

#### 3.1 Characterisation data

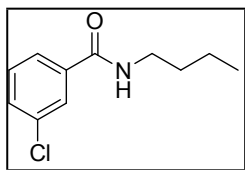

**N-Butyl-3-chlorobenzamide (5aa):**  $^1\text{H NMR}$  (400.12 MHz,  $\text{CDCl}_3$ ):  $\delta$  = 0.85 (t,  $J$  = 7.3 Hz, 3 H), 1.25–1.32 (m, 2 H), 1.45–1.53 (m, 2 H), 3.31–3.36 (m, 2 H), 6.69 (br s, 1 H), 7.22–7.26 (m, 1 H), 7.35 (d,  $J$  = 8.9 Hz, 1 H), 7.56 (d,  $J$  = 7.7 Hz, 1 H), 7.68 (s, 1 H);  $^{13}\text{C NMR}$  (100.62 MHz,  $\text{CDCl}_3$ ):  $\delta$  = 14.2, 20.5, 32.0, 40.4, 125.5, 127.7, 130.1, 131.6, 134.9, 137.0, 166.7; FT-IR ( $\text{CHCl}_3$ ):  $\nu$  = 3451, 3069, 3008, 2961, 2932, 2874, 1657, 1521, 1470, 1287, 1079  $\text{cm}^{-1}$ ; GC-MS (70 eV):  $m/z$  (%) = 211 ( $\text{M}^+$ , 12), 168 (23), 139 (100), 111 (34), 75 (16), 50 (4). HRMS (ESI):  $m/z$  calcd for  $\text{C}_{11}\text{H}_{15}\text{ClNO}$  [ $\text{M} + \text{H}$ ] $^+$  212.0842, found 212.0851.

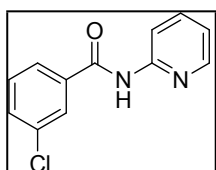

**3-Chloro-N-(pyridin-2-yl)benzamide (5ac):**  $^1\text{H NMR}$  (400.12 MHz,  $\text{CDCl}_3$ ):  $\delta$  = 7.02–7.04 (m, 1 H), 7.37 (t,  $J$  = 7.9 Hz, 1 H), 7.48–7.50 (m, 1 H), 7.73–7.78 (m, 2 H), 7.91–7.92 (m, 1 H), 8.10–8.12 (m, 1 H), 8.36 (d,  $J$  = 8.4 Hz, 1 H), 9.38 (br s, 1 H);  $^{13}\text{C NMR}$  (100.62 MHz,  $\text{CDCl}_3$ ):  $\delta$  = 114.5, 120.1, 125.4, 127.9, 130.0, 132.1, 135.0, 136.2, 138.3, 147.6, 151.4, 164.7; FT-IR ( $\text{CHCl}_3$ ):  $\nu$  = 3417, 3072, 3027, 3011, 2959, 2927, 2855, 1681, 1577, 1520, 1434, 1308, 1254; GC-MS (70 eV):  $m/z$  (%) = 232 ( $\text{M}^+$ , 17), 203 (100), 139 (84), 111 (65), 75 (26), 50 (8). HRMS (ESI):  $m/z$  calcd for  $\text{C}_{12}\text{H}_{10}\text{ClN}_2\text{O}$  [ $\text{M} + \text{H}$ ] $^+$  233.0482, found 233.0470.

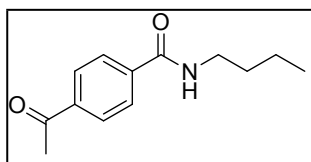

**4-Acetyl-N-butylbenzamide (5ba):**  $^1\text{H NMR}$  (400.12 MHz,  $\text{CDCl}_3$ ):  $\delta$  = 0.96 (t,  $J$  = 7.3 Hz, 3 H), 1.37–1.45 (m, 2 H), 1.58–1.64 (m, 2 H), 2.63 (s, 3 H), 3.44–3.49 (m, 2 H), 6.44 (br s, 1 H), 7.85 (d,  $J$  = 8.2 Hz, 2 H), 7.97 (d,  $J$  = 8.2 Hz, 2 H);  $^{13}\text{C NMR}$  (100.62 MHz,  $\text{CDCl}_3$ ):  $\delta$  = 13.7, 20.1, 26.7, 31.6, 40.0, 127.2, 128.4, 138.8, 139.0, 166.6, 197.5; FT-IR ( $\text{CHCl}_3$ ):  $\nu$  = 3026, 3010, 2961, 2930, 2874, 2862, 1686, 1660, 1526, 1466, 1359, 1267  $\text{cm}^{-1}$ ; GC-MS (70 eV):  $m/z$  (%) = 219 ( $\text{M}^+$ , 18), 204 (5), 190 (4), 147 (100), 119 (9), 104 (14), 91 (14), 76 (11), 65 (3), 50 (4). HRMS (ESI):  $m/z$  calcd for  $\text{C}_{13}\text{H}_{18}\text{NO}_2$  [ $\text{M} + \text{H}$ ] $^+$  220.1338, found 220.1342.

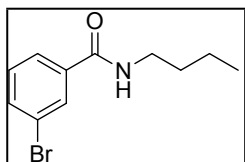

**3-Bromo-N-butylbenzamide (5ga):**  $^1\text{H NMR}$  (400.12 MHz,  $\text{CDCl}_3$ ):  $\delta$  = 0.97 (t,  $J$  = 7.3 Hz, 3 H), 1.37–1.45 (m, 2 H), 1.57–1.64 (m, 2 H), 3.43–3.48 (m, 2 H), 6.07 (br s, 1 H), 7.30 (t,  $J$  = 7.9 Hz, 1 H), 7.61–7.63 (m, 1 H), 7.67–7.69 (m, 1 H), 7.89–7.90 (m, 1 H);  $^{13}\text{C NMR}$  (100.62 MHz,  $\text{CDCl}_3$ ):  $\delta$  = 13.7, 20.1, 31.6, 39.9, 122.7, 125.3, 130.0, 130.1, 134.2, 136.8, 166.0 ppm; FT-IR ( $\text{CHCl}_3$ ):  $\nu$  = 3451, 3009, 2961, 2932, 2874, 1658, 1566, 1521, 1469, 1285  $\text{cm}^{-1}$ ; GC-MS (70 eV):  $m/z$  (%) = 255 ( $\text{M}^+$ , 13), 213 (28), 183 (100), 157 (33), 76 (23), 50 (9). HRMS (ESI):  $m/z$  calcd for  $\text{C}_{11}\text{H}_{15}\text{BrNO}$  [ $\text{M} + \text{H}$ ] $^+$  256.0337, found 256.0347.

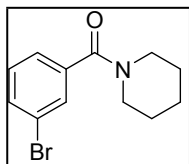

**3-Bromophenyl(piperidin-1-yl)methanone (5gb):**  $^1\text{H}$  NMR (400.12 MHz,  $\text{CDCl}_3$ ):  $\delta$  = 1.24–1.28 (m, 2 H), 1.52–1.68 (m, 4 H), 3.33 (br s, 2 H), 3.70 (br s, 2 H), 7.25–7.32 (m, 3 H), 7.52–7.54 (m, 1 H);  $^{13}\text{C}$  NMR (100.62 MHz,  $\text{CDCl}_3$ ):  $\delta$  = 25.5, 26.5, 29.6, 43.2, 48.7, 122.5, 125.3, 129.8, 130.0, 132.4, 138.4, 168.5; FT-IR ( $\text{CHCl}_3$ ):  $\nu$  = 2955, 2923, 2853, 2360, 2341, 1731, 1463, 1377, 1286, 1272  $\text{cm}^{-1}$ ; GC-MS (70 eV):  $m/z$  (%) = 267 ( $\text{M}^+$ , 100), 183 (66), 155 (32), 76 (20), 50 (7). HRMS (ESI):  $m/z$  calcd for  $\text{C}_{12}\text{H}_{15}\text{BrNO}$  [ $\text{M} + \text{H}$ ] $^+$  268.0337, found 268.0329.

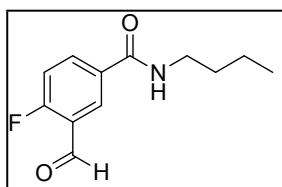

**N-Butyl-4-fluoro-3-formylbenzamide (5ha):**  $^1\text{H}$  NMR (400.12 MHz,  $\text{CDCl}_3$ ):  $\delta$  = 0.96 (t,  $J$  = 7.3 Hz, 3 H), 1.39–1.45 (m, 2 H), 1.58–1.65 (m, 2 H), 3.44–3.49 (m, 2 H), 6.39 (br s, 1 H), 7.27 (t,  $J$  = 9.5 Hz, 1 H), 8.18–8.21 (m, 2 H), 10.38 (s, 1 H);  $^{13}\text{C}$  NMR (100.62 MHz,  $\text{CDCl}_3$ ):  $\delta$  = 13.7, 20.1, 31.6, 40.0, 117.2 (d,  $J$  = 21.1 Hz), 123.5 (d,  $J$  = 8.7 Hz), 126.3 (d,  $J$  = 2.2 Hz), 131.6 (d,  $J$  = 3.2 Hz), 136.1 (d,  $J$  = 9.9 Hz), 165.1, 166.1 (d,  $J$  = 263.7), 186.4 (d,  $J$  = 6.2 Hz); FT-IR ( $\text{CHCl}_3$ ):  $\nu$  = 3009, 2961, 2931, 2873, 1695, 1660, 1608, 1527, 1488  $\text{cm}^{-1}$ ; GC-MS (70 eV):  $m/z$  (%) = 223 ( $\text{M}^+$ , 8), 181 (28), 151 (100), 123 (17), 95 (12), 75 (12). HRMS (ESI):  $m/z$  calcd for  $\text{C}_{12}\text{H}_{15}\text{FNO}_2$  [ $\text{M} + \text{H}$ ] $^+$  224.1087, found 224.1095.

### 3.2 Copies of $^1\text{H}$ - and $^{13}\text{C}$ -NMR spectra

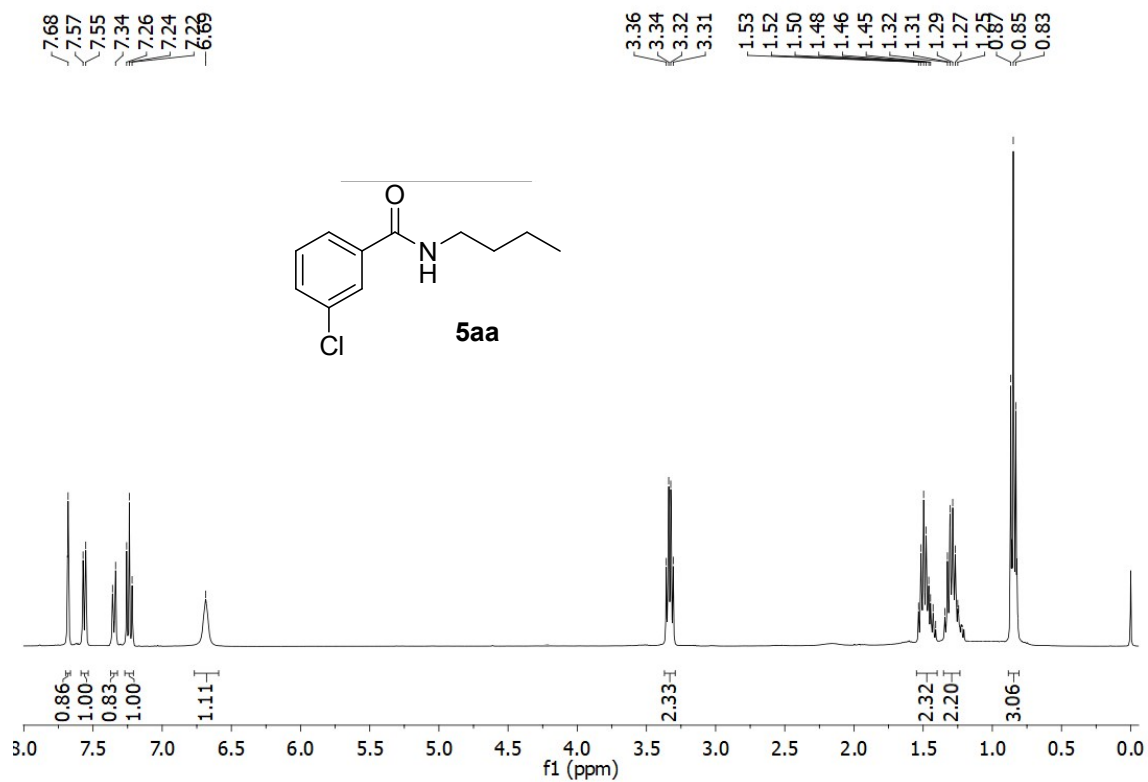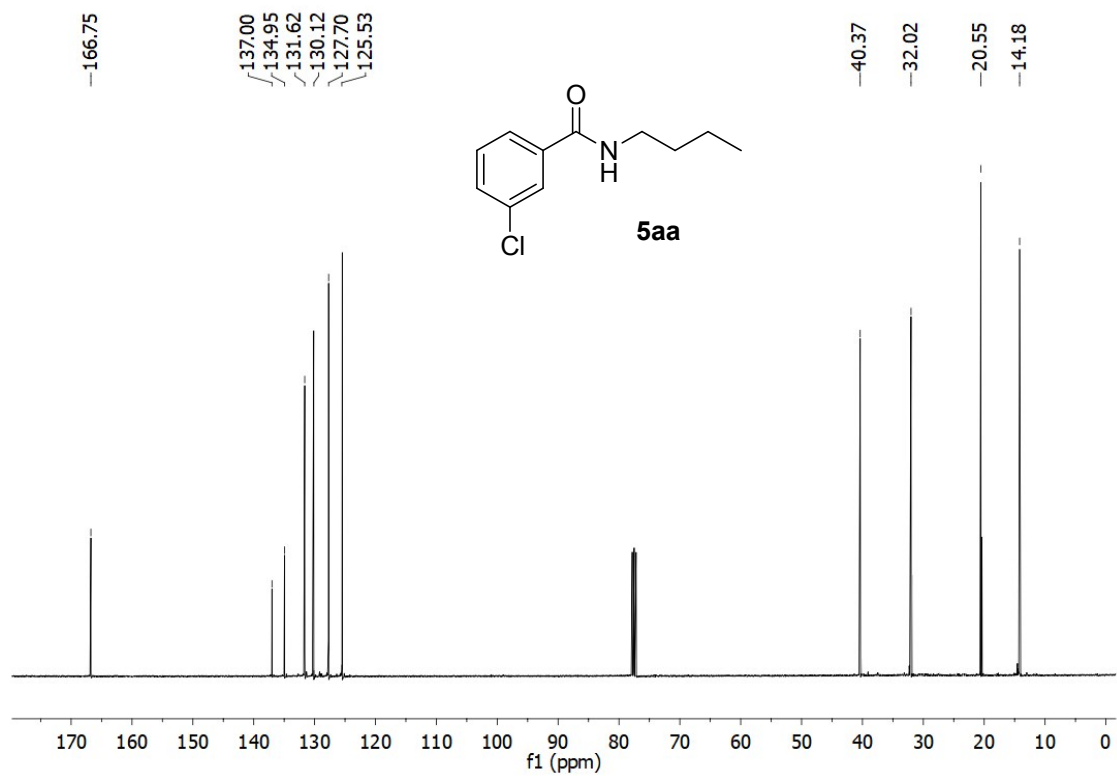

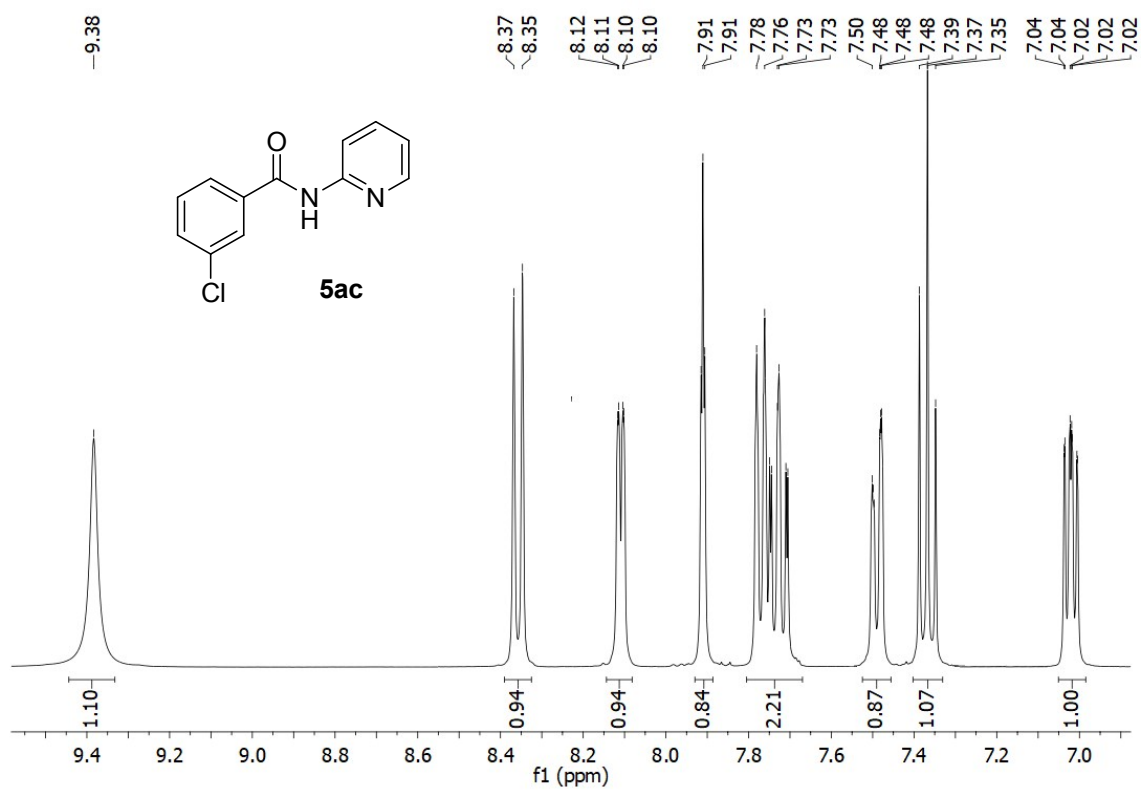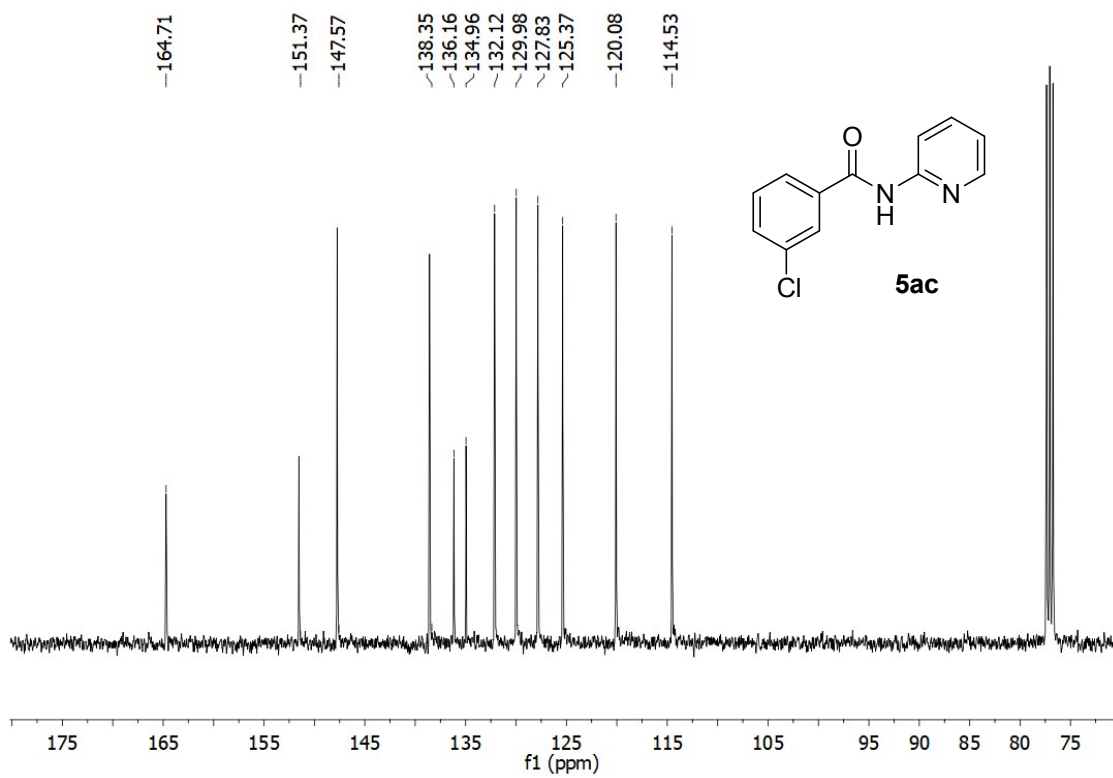



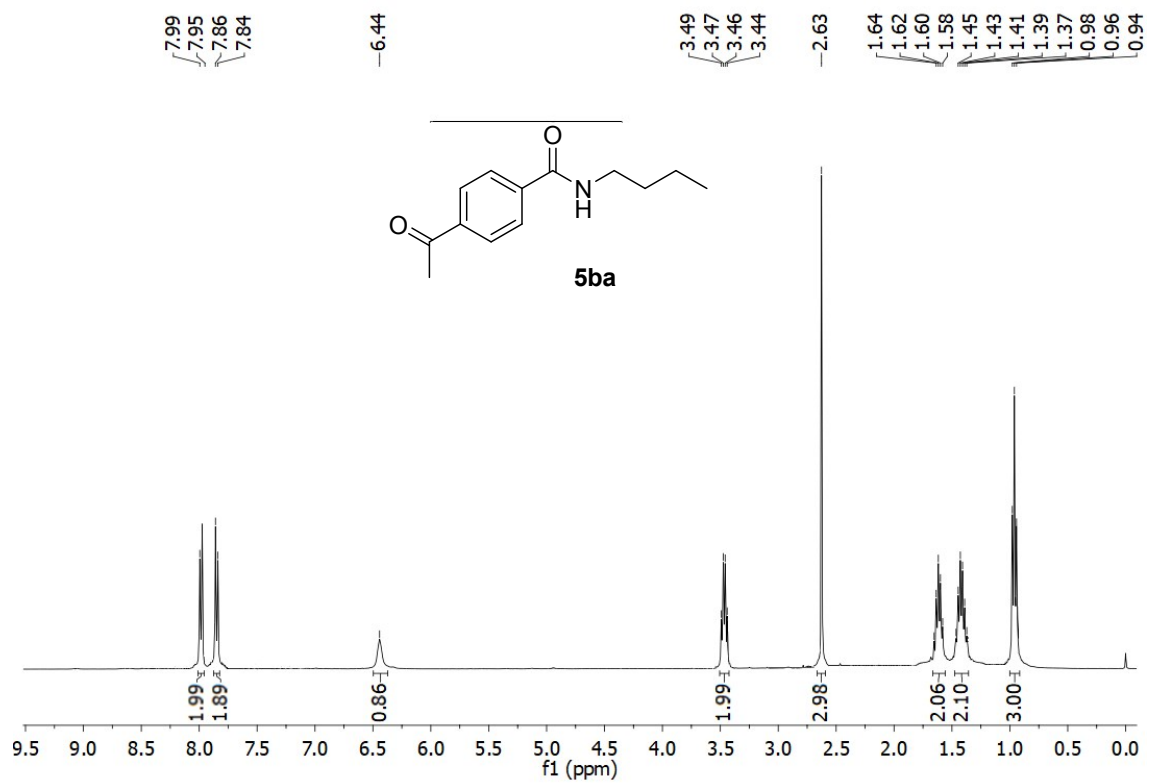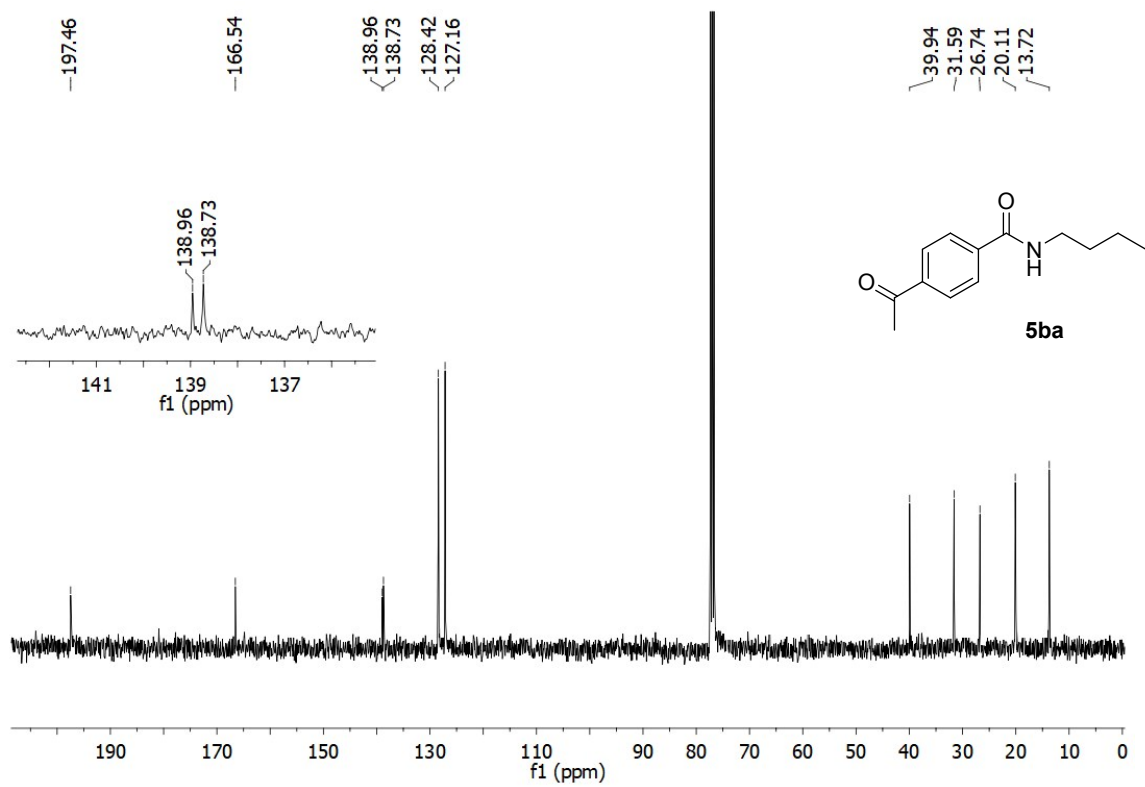

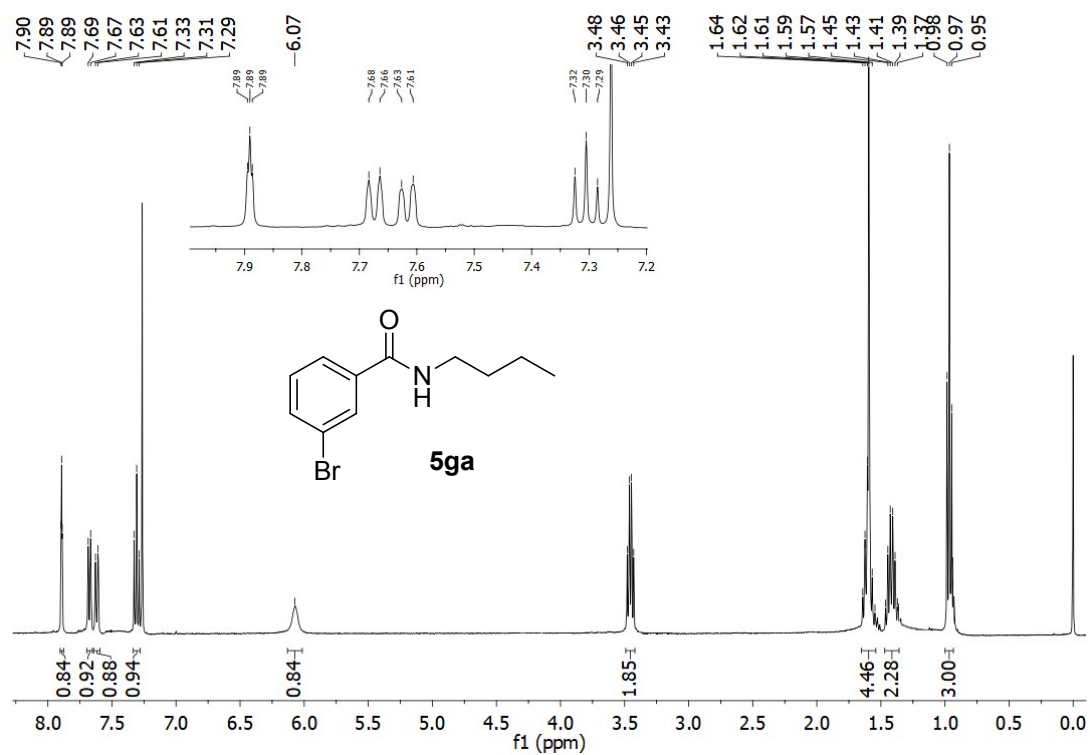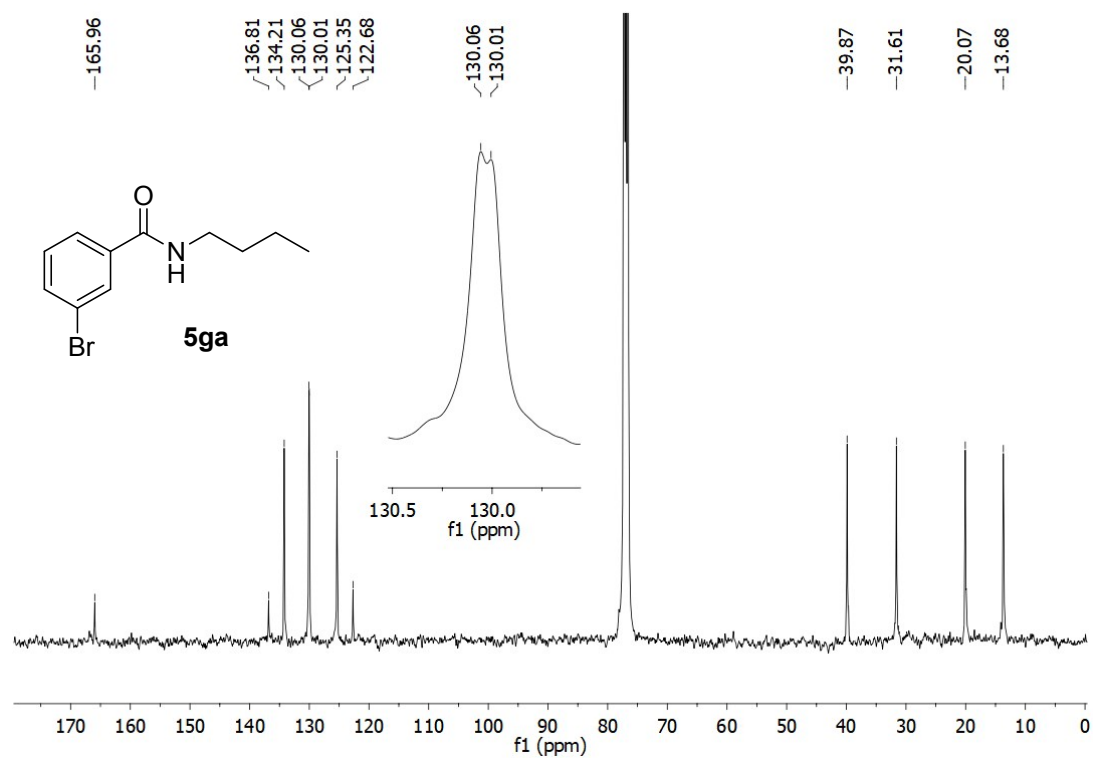

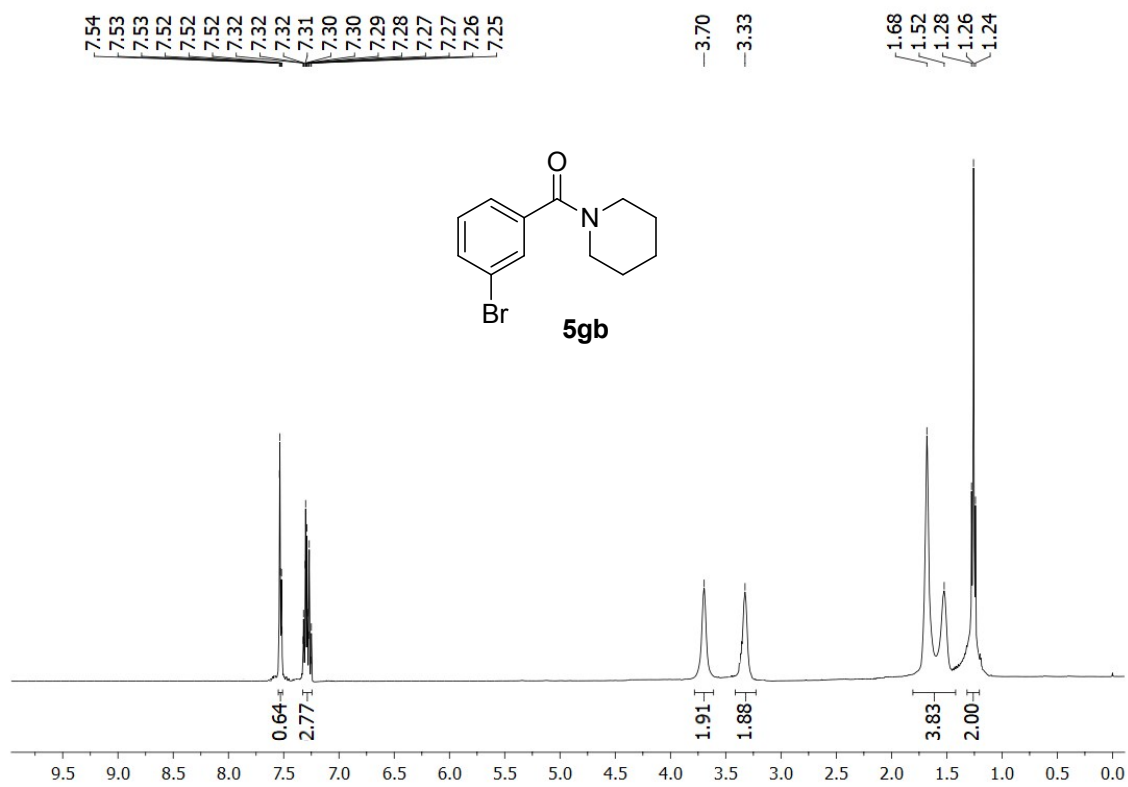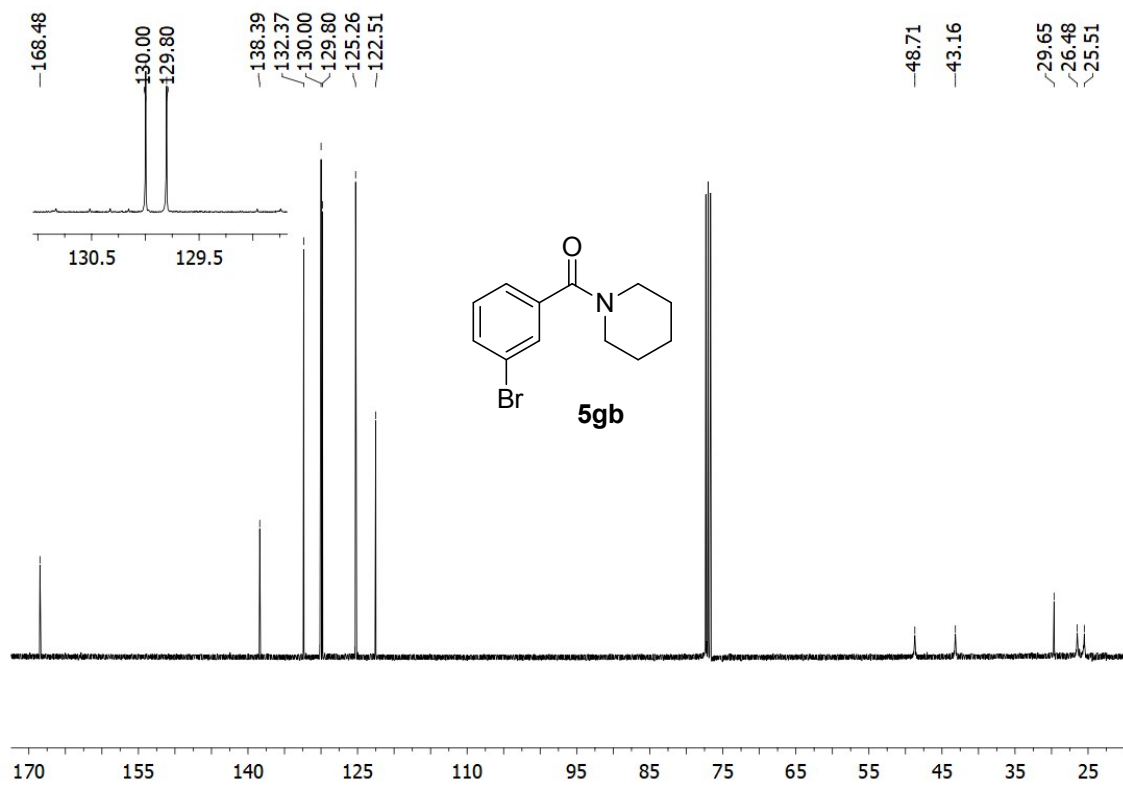

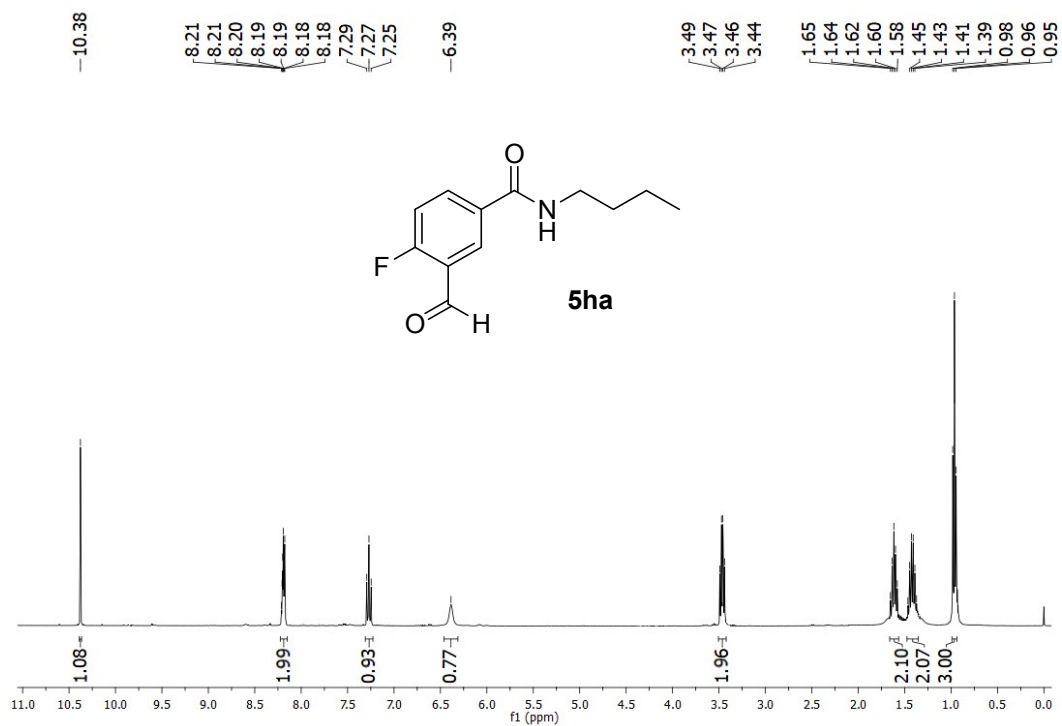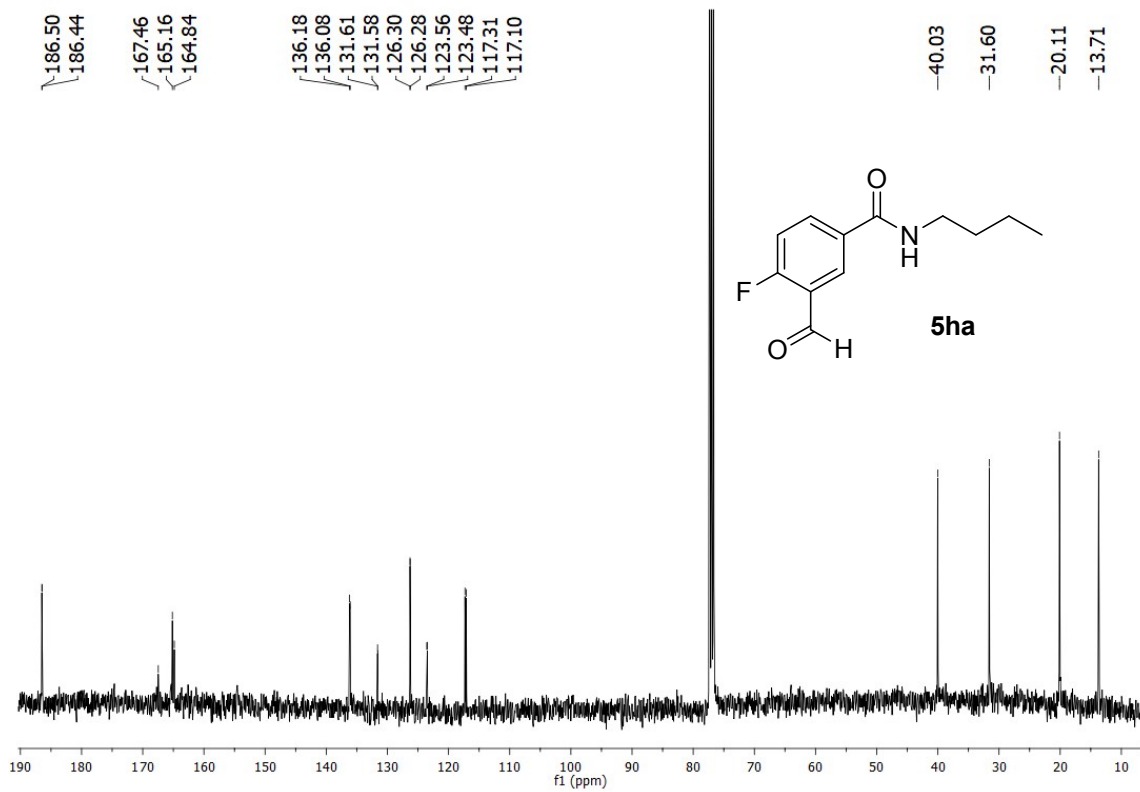

Supplement: c8cc03858a1.pdf [file c8cc03858a1.pdf]
